# Supplementary material for: Synthesis of cobalt phosphide hybrid for simultaneous electrochemical detection of ascorbic acid, dopamine, and uric acid
Source: Royal Society of Chemistry journal article supplement (doi:10.1039/d4ra01702a), 2024-01-01
Supplement: d4ra01702a1.pdf [file d4ra01702a1.pdf]

## Supplementary Information

### **Synthesis of cobalt phosphide hybrid for simultaneous electrochemical detection of ascorbic acid, dopamine, and uric acid**

Hongyang Xu, Yulu Hang, Xiaoyu Lei, Jinan Deng\*, Jun Yang\*

Key Laboratory of Biorheological Science and Technology, Ministry of Education and  
Bioengineering College, Chongqing University, Chongqing 400044, China.

\*Corresponding authors:

biojdeng@cqu.edu.cn (J. Deng)

bioyangjun@cqu.edu.cn (J. Yang)

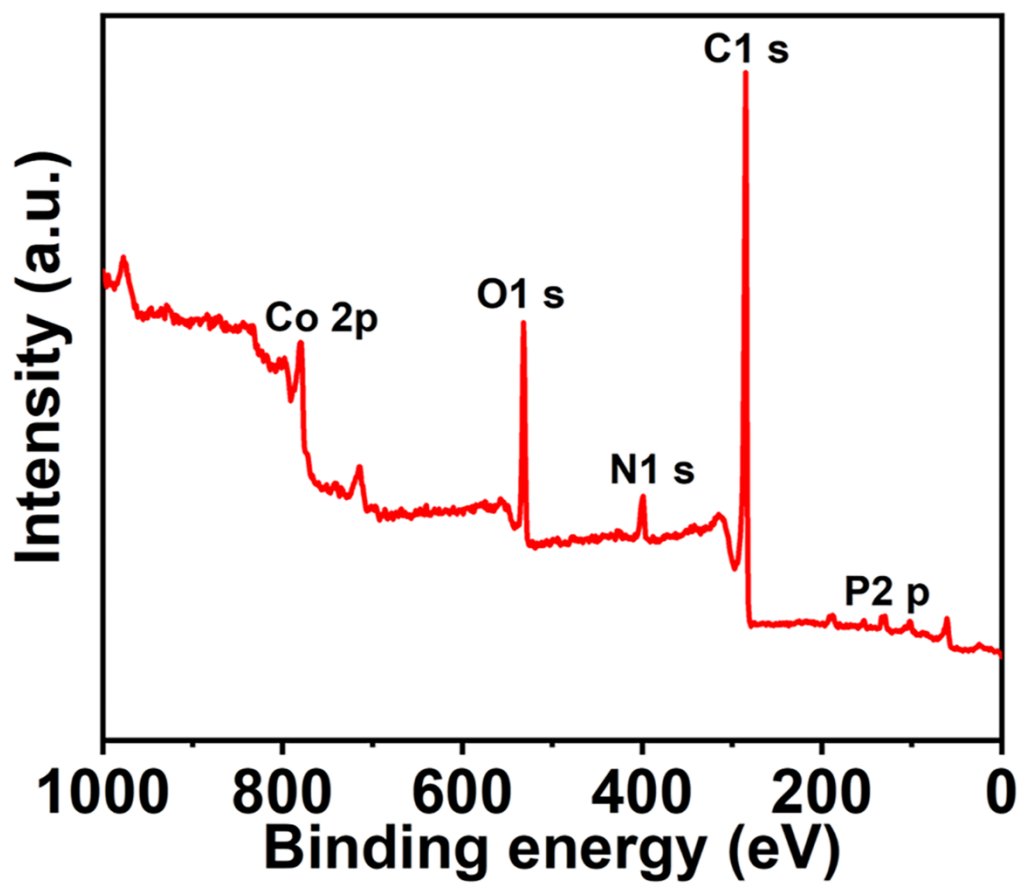

Fig. S1 Fully survey spectrum of Co<sub>2</sub>P hybrid

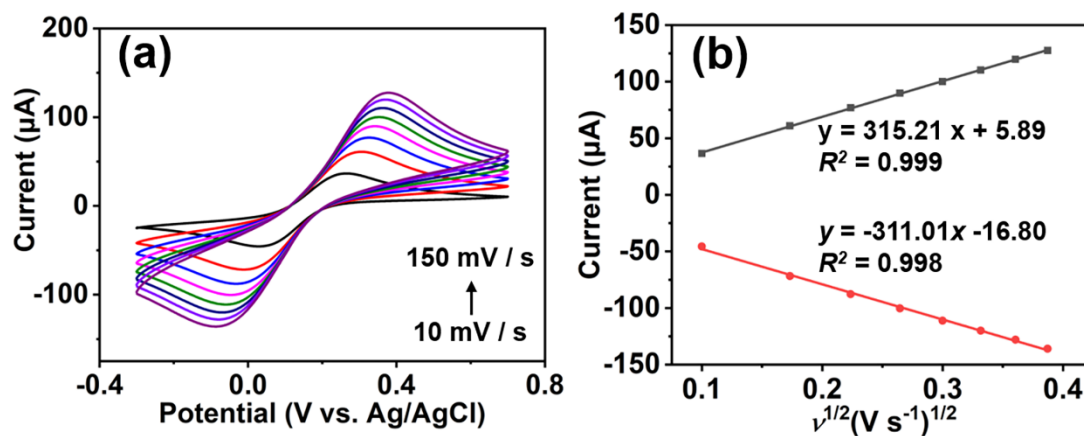

**Fig. S2** CV response of bare SPE (a) and the corresponding plots of the peak current versus square root of scan rate for 5 mM  $[\text{Fe}(\text{CN})_6]^{3-/4-}$  in 0.1 M KCl aqueous solution at various scan rates.
